# Supplementary material for: Theoretical performance evaluation of hypergolic ionic liquid fuels with storable oxidizers
Source: Royal Society of Chemistry journal article supplement (doi:10.1039/c7nj01748k), 2017-01-01
Supplement: c7nj01748k1.pdf [file c7nj01748k1.pdf]

## **Supporting Information**

### **Theoretical performance evaluation of hypergolic ionic liquid fuels with storable oxidizers**

Vikas K. Bhosale, Suresh G. Kulkarni, Prashant S. Kulkarni\*

Energy and Environmental Laboratory, Department of Applied Chemistry, Defence Institute of Advanced Technology, Pune, India.

Email: [ps\\_kulkarni@rediffmail.com](mailto:ps_kulkarni@rediffmail.com)

#### **Contents**

**ESI-1:** The sample output of NASA-CEC-71 of IL AEIM][BH<sub>3</sub>CN] with WFNA.

**ESI-2:** C\* and I<sub>sp</sub> of HILs and UDMH with WFNA, RFNA, N<sub>2</sub>O<sub>4</sub> and H<sub>2</sub>O<sub>2</sub> oxidizers.

**ESI-1: The sample output of NASA-CEC 71 of IL [AEIM][BH<sub>3</sub>CN] with WFNA.**

INPUT FILE NAME FLI(PROP DATA):il125w.d

INPUT FILE NAME FLS(CONTROL) :bhi2.d

OUTPUT FILE NAME FLO :il125w.o

REACTANTS

|   |       |        |       |      |     |        |           |        |        |
|---|-------|--------|-------|------|-----|--------|-----------|--------|--------|
| C | 9.00H | 16.00N | 3.00B | 1.00 | .00 | 100.00 | 56660.10  | 298.15 | .95LF  |
| N | 1.00H | 1.00O  | 3.00  | .00  | .00 | 100.00 | -41610.00 | 298.15 | 1.48LO |

NAME

SPECIES BEING CONSIDERED IN THIS SYSTEM

|                |               |                  |               |                 |
|----------------|---------------|------------------|---------------|-----------------|
| J12/64 B(S)    | J12/64 B(L)   | J12/64 B         | J12/64 BH     | J12/64 BH2      |
| J12/64 BH3     | J 6/66 BN(S)  | J 6/66 BN        | J 6/68 BO     | J 6/68 BO2      |
| J12/64 B2      | J 6/66 B2O    | J24/91 BO2H      | J20/91 BO2H2  | J27/91 BO3H3(S) |
| J25/91 BO3H3   | J14/91 B2O4H4 | J12/91 B2H6      | J 5/91 B3N3H6 | J12/64 B2O2     |
| J12/64 B2O3(L) | J12/64 B2O3   | J17/91 B3O3H3(S) | J 6/91 B3O3H3 | J18/91 B3H3O6   |
| J 7/91 B4C(S)  | J13/91 B5H9   | J20/91 B10H14(L) | J 8/91 B10H14 | J 3/61 C(S)     |
| J 3/61 C       | J12/67 CH     | J 6/69 CH2       | J 3/61 CH2O   | J 6/69 CH3      |
| J 3/61 CH4     | J 6/69 CN     | J 6/66 CN2       | J 9/65 CO     | J 9/65 CO2      |
| J12/69 C2      | J 3/67 C2H    | J 3/61 C2H2      | J 9/65 C2H4   | J 3/67 C2N      |
| J 3/61 C2N2    | J 9/66 C2O    | J12/69 C3        | J 6/68 C3O2   | J12/69 C4       |
| J12/69 C5      | J 9/65 H      | J12/64 HBO       | J12/64 HBO2   | 000000 HCN      |
| J 3/61 HCO     | J 3/63 HNO    | J 3/64 HO2       | J 3/61 H2     | L11/65 H2O(S)   |
| L11/65 H2O(L)  | J 3/61 H2O    | L 2/69 H2O2      | J12/64 H3B3O6 | J 3/61 N        |
| J12/65 NH      | J12/65 NH2    | J 9/65 NH3       | J 6/63 NO     | J 9/64 NO2      |
| J 9/65 N2      | J 6/66 N2C    | J12/65 N2H4      | J12/64 N2O    | J 9/64 N2O4     |
| J 6/62 O       | J 3/66 OH     | J 9/65 O2        |               |                 |

OF = 2.500000

|                    | EFFECTIVE FUEL | EFFECTIVE OXIDANT | MIXTURE        |
|--------------------|----------------|-------------------|----------------|
| ENTHALPY           | HPP(2)         | HPP(1)            | HSUB0          |
| (KG-MOL)(DEG K)/KG | .16103690E+03  | -.33230770E+03    | -.19135210E+03 |
| KG-ATOMS/KG        | BOP(I,2)       | BOP(I,1)          | B0(I)          |
| C                  | .50830510E-01  | .00000000E+00     | .14523000E-01  |

|   |               |               |               |
|---|---------------|---------------|---------------|
| H | .90365350E-01 | .15869990E-01 | .37154380E-01 |
| N | .16943500E-01 | .15869990E-01 | .16176710E-01 |
| B | .56478340E-02 | .00000000E+00 | .16136670E-02 |
| O | .00000000E+00 | .47609980E-01 | .34007130E-01 |

PT C H N B O

1 -14.388 -9.871 -13.417 -17.560 -17.321 5.000

THEORETICAL ROCKET PERFORMANCE ASSUMING FROZEN COMPOSITION DURING EXPANSION

PC = 2.53830 MPA

CASE NO. 1

WT FRACTION ENERGY STATE TEMP DENSITY

| CHEMICAL FORMULA                              | (SEE NOTE) | CAL/MOL | DEG K      | G/CC            |
|-----------------------------------------------|------------|---------|------------|-----------------|
| FUEL C 9.00000 H 16.00000 N 3.00000 B 1.00000 |            | 1.00000 | 56660.100  | L 298.15 .9533  |
| OXIDANT N 1.00000 H 1.00000 O 3.00000         |            | 1.00000 | -41610.000 | L 298.15 1.4800 |

O/F= 2.5000 PERCENT FUEL= 28.5714 EQUIVALENCE RATIO= 1.4716 REACTANT DENSITY= 1.2782

CHAMBER THROAT EXIT EXIT

|             |            |            |            |            |
|-------------|------------|------------|------------|------------|
| PC/P        | .1000E+01  | .1786E+01  | .2500E+02  | .2460E+02  |
| P MPA       | .2538E+01  | .1421E+01  | .1015E+00  | .1032E+00  |
| T DEG K     | .3018E+04  | .2716E+04  | .1647E+04  | .1653E+04  |
| RHO G/CC    | .2375E-02  | .1477E-02  | .1740E-03  | .1763E-03  |
| H CAL/G     | -.3803E+03 | -.5206E+03 | -.9987E+03 | -.9964E+03 |
| S CAL/G/K   | .2676E+01  | .2676E+01  | .2676E+01  | .2676E+01  |
| M MOL WT    | .2351E+02  | .2351E+02  | .2351E+02  | .2351E+02  |
| CP CAL/G K  | .4676E+00  | .4622E+00  | .4276E+00  | .4279E+00  |
| GAMMA (S)   | .1221E+01  | .1224E+01  | .1246E+01  | .1246E+01  |
| SON VEL M/S | .1141E+04  | .1084E+04  | .8519E+03  | .8532E+03  |
| MACH NO.    | .0000E+00  | .1000E+01  | .2670E+01  | .2661E+01  |
| AE/AT       | .1000E+01  | .4045E+01  | .4000E+01  |            |
| C* M/S      | .1583E+04  | .1583E+04  | .1583E+04  |            |
| CF          | .6851E+00  | .1438E+01  | .1435E+01  |            |

IVAC KG-S/KG .2008E+03 .2581E+03 .2578E+03

ISP KG-S/KG .1105E+03 .2320E+03 .2315E+03

MOLE FRACTIONS

BO .2883E-03 BO2 .6907E-03 BO2H .1835E-01 BO3H3 .3467E-04

B2O3 .3047E-03 CO .2574E+00 CO2 .8400E-01 H .1153E-01

HBO .5630E-05 HBO2 .1796E-01 HCO .4675E-04 H2 .1214E+00

H2O .2867E+00 NO .1233E-02 N2 .1896E+00 O .5418E-03

OH .9288E-02 O2 .5176E-03

ADDITIONAL PRODUCTS WHICH WERE CONSIDERED BUT WHOSE MOLE FRACTIONS WERE LESS THAN .50000E-05 FOR ALL ASSIGNED CONDITIONS

B(S) B(L) B BH BH2 BH3 BN(S) BN B2 B2O

BO2H2 BO3H3(S) B2O4H4 B2H6 B3N3H6 B2O2 B2O3(L) B3O3H3(S) B3O3H3 B3H3O6

B4C(S) B5H9 B10H14(L) B10H14 C(S) C CH CH2 CH2O CH3

CH4 CN CN2 C2 C2H C2H2 C2H4 C2N C2N2 C2O

C3 C3O2 C4 C5 HCN HNO HO2 H2O(S) H2O(L) H2O2

H3B3O6 N NH NH2 NH3 NO2 N2C N2H4 N2O N2O4

NOTE. WEIGHT FRACTION OF FUEL IN TOTAL FUELS AND OF OXIDANT IN TOTAL OXIDANTS

END

ESI-2:  $C^*$  and  $I_{sp}$  of the HILs and UDMH with WFNA, RFNA,  $N_2O_4$  and  $H_2O_2$  oxidizers

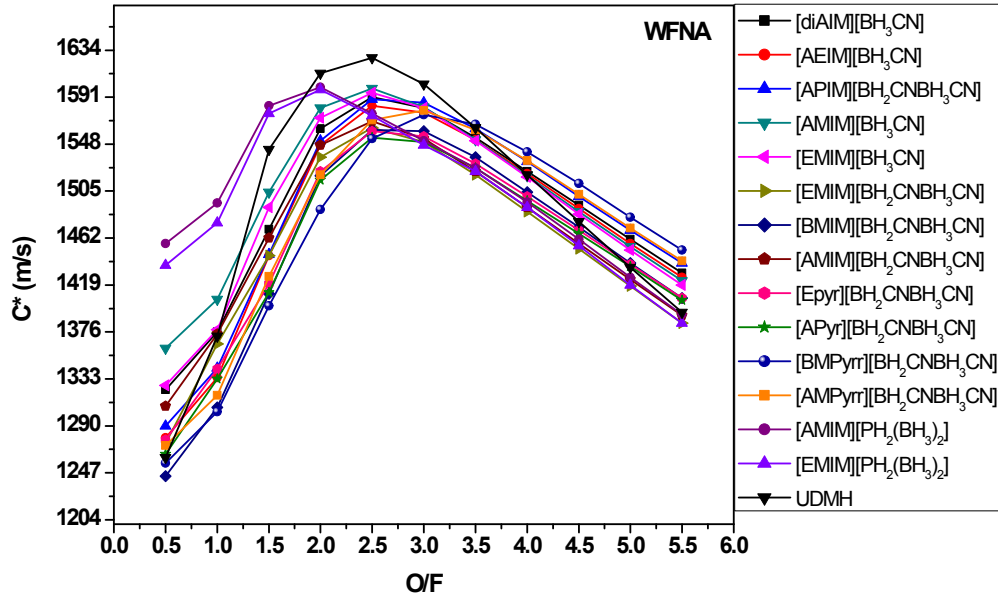

Figure SI-2a.  $C^*$  of the HILs with WFNA at different O/F ( $P_c = 2.4 \times 10^6$  Pa,  $P_e = 9.8 \times 10^4$  Pa,  $A_e/A_t = 4$ ).

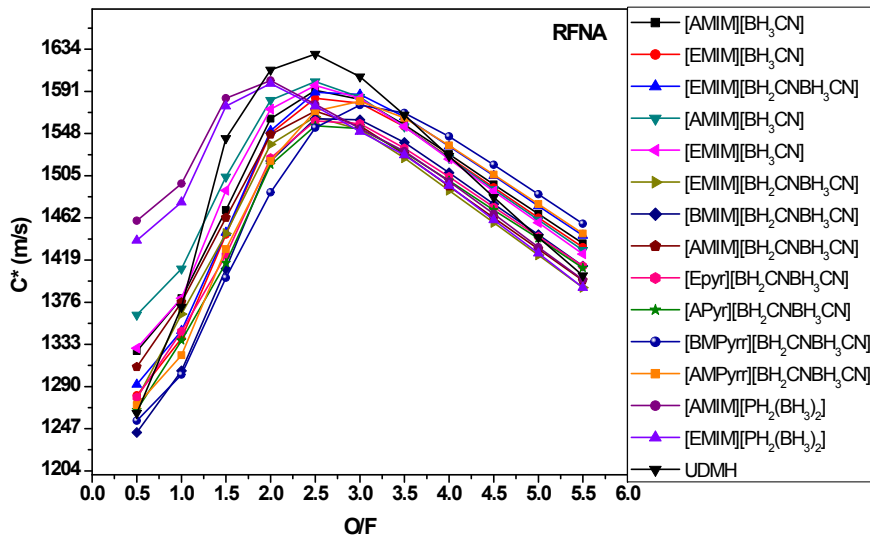

Figure SI-2b.  $C^*$  of HILs with RFNA at different O/F ( $P_c = 2.4 \times 10^6$  Pa,  $P_e = 9.8 \times 10^4$  Pa,  $A_e/A_t = 4$ ).

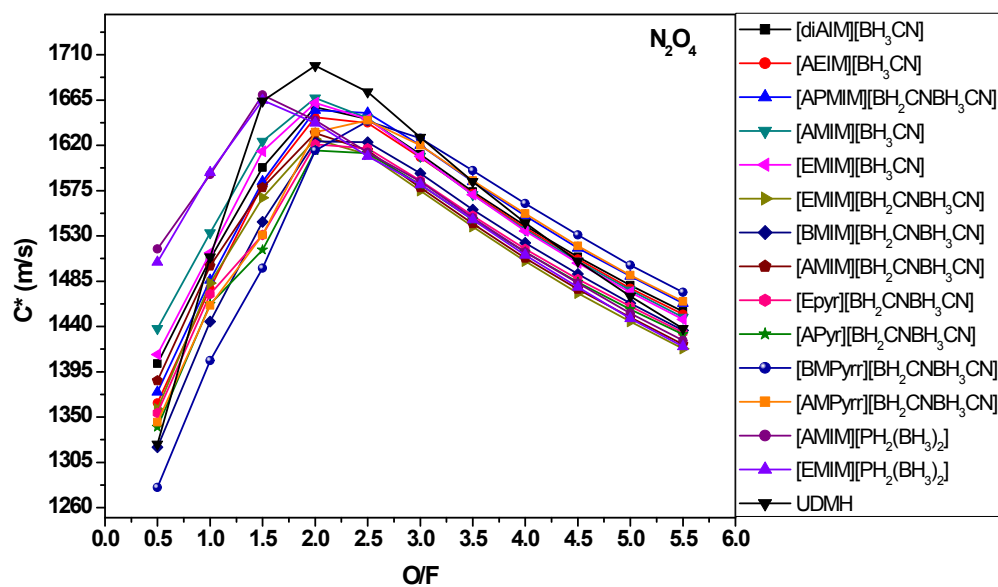

Figure SI-2c.  $C^*$  of HILs with  $N_2O_4$  at different O/F ( $P_c = 2.4 \times 10^6$  Pa,  $P_e = 9.8 \times 10^4$  Pa,  $A_e/A_t = 4$ ).

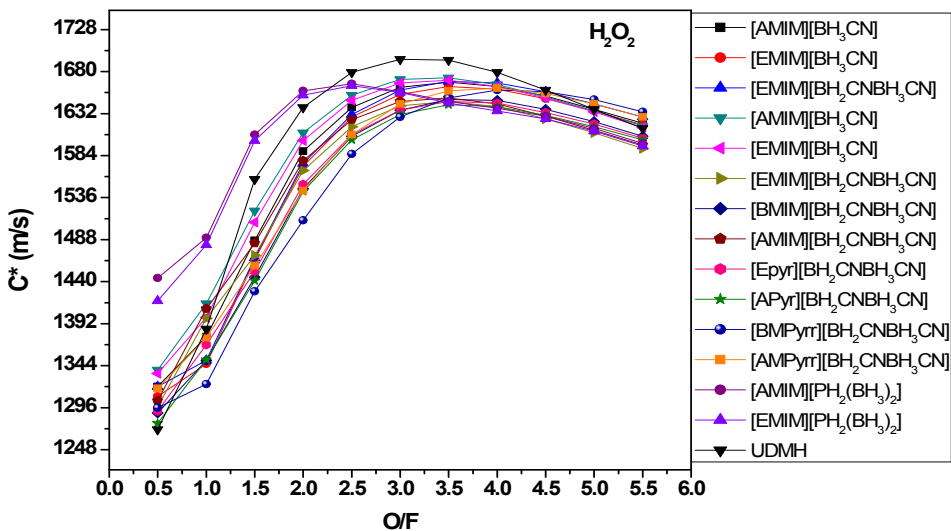

Figure SI-2d.  $C^*$  of HILs with  $H_2O_2$  at different O/F ( $P_c = 2.4 \times 10^6$  Pa,  $P_e = 9.8 \times 10^4$  Pa,  $A_e/A_t = 4$ ).

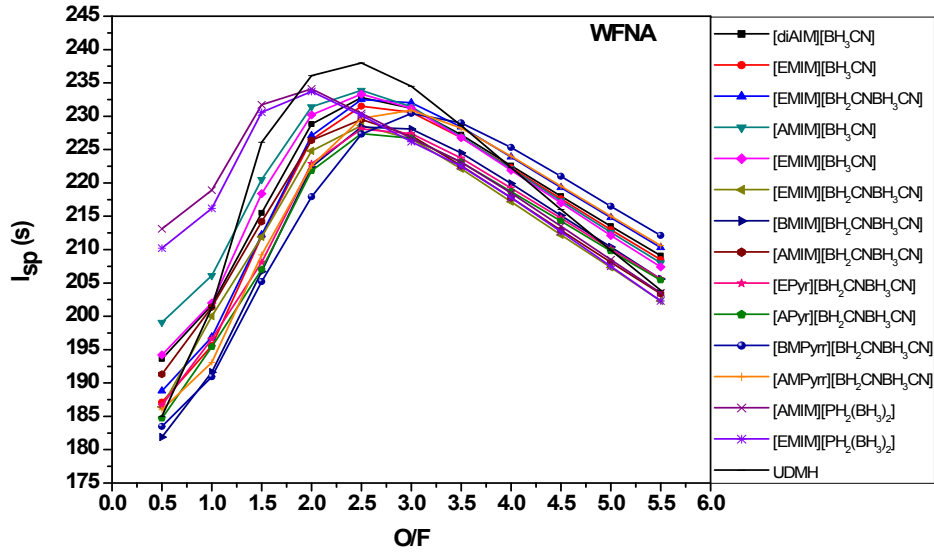

Figure SI-2e.  $I_{sp}$  of HILs with WFNA at different O/F ( $P_c = 2.4 \times 10^6$  Pa,  $P_e = 9.8 \times 10^4$  Pa,  $A_e/A_t = 4$ ).

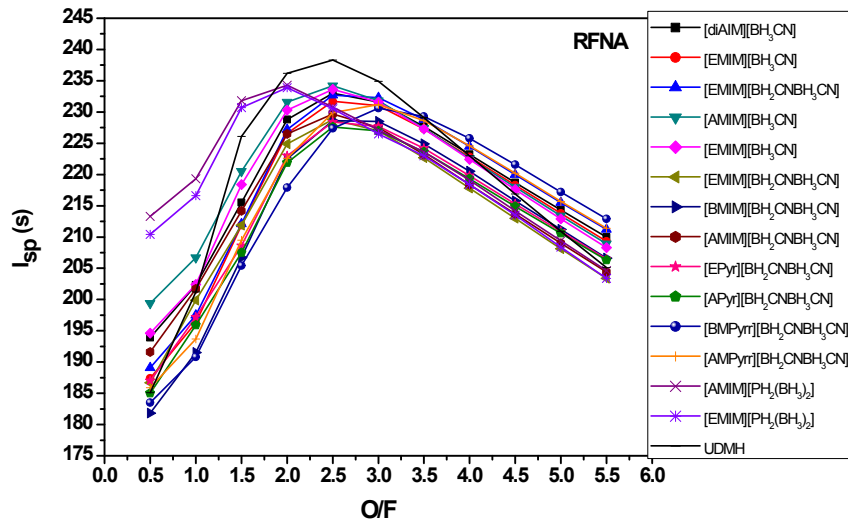

Figure SI-2f.  $I_{sp}$  of HILs with RFNA at different O/F ( $P_c = 2.4 \times 10^6$  Pa,  $P_e = 9.8 \times 10^4$  Pa,  $A_e/A_t = 4$ ).

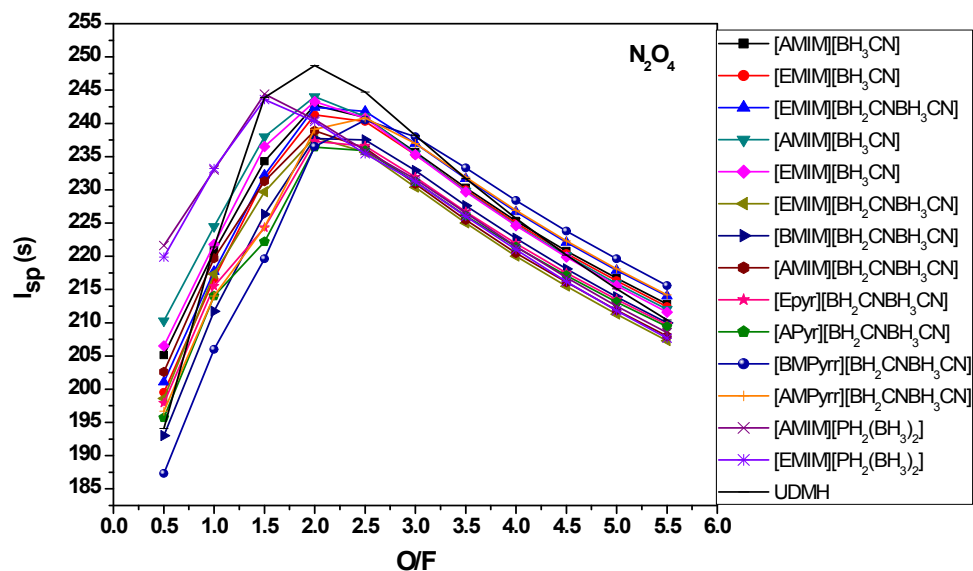

Figure SI-2g.  $I_{sp}$  of HILs with  $N_2O_4$  at different O/F ( $P_c = 2.4 \times 10^6$  Pa,  $P_e = 9.8 \times 10^4$  Pa,  $A_e/A_t = 4$ ).

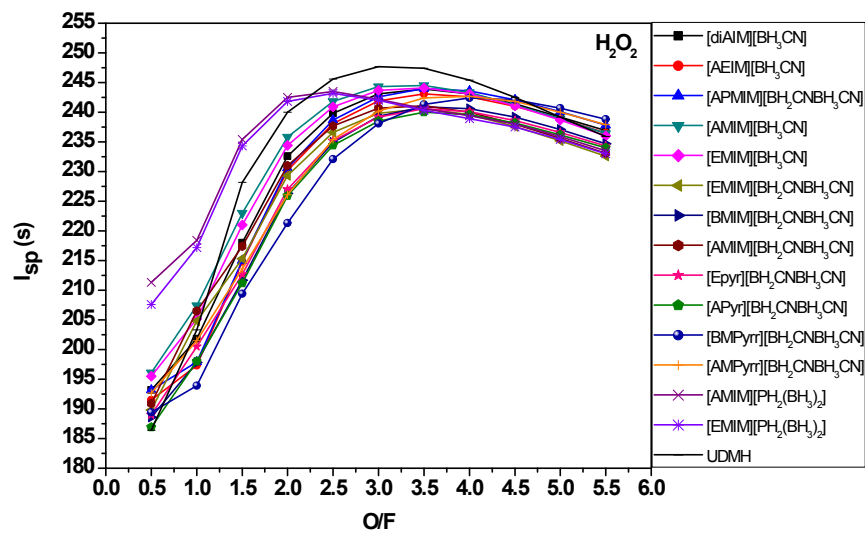

Figure SI-2h.  $I_{sp}$  of HILs with  $H_2O_2$  at different O/F ( $P_c = 2.4 \times 10^6$  Pa,  $P_e = 9.8 \times 10^4$  Pa,  $A_e/A_t = 4$ ).
